# Supplementary material for: Convergence of miR-143 overexpression, oxidative stress and cell death in HCT116 human colon cancer cells
Source: PubMed Central journal article supplement (PMC5779689; doi:10.1371/journal.pone.0191607), 2018-01-23
Supplement: pone.0191607.s001.pdf [file pone.0191607.s001.pdf]

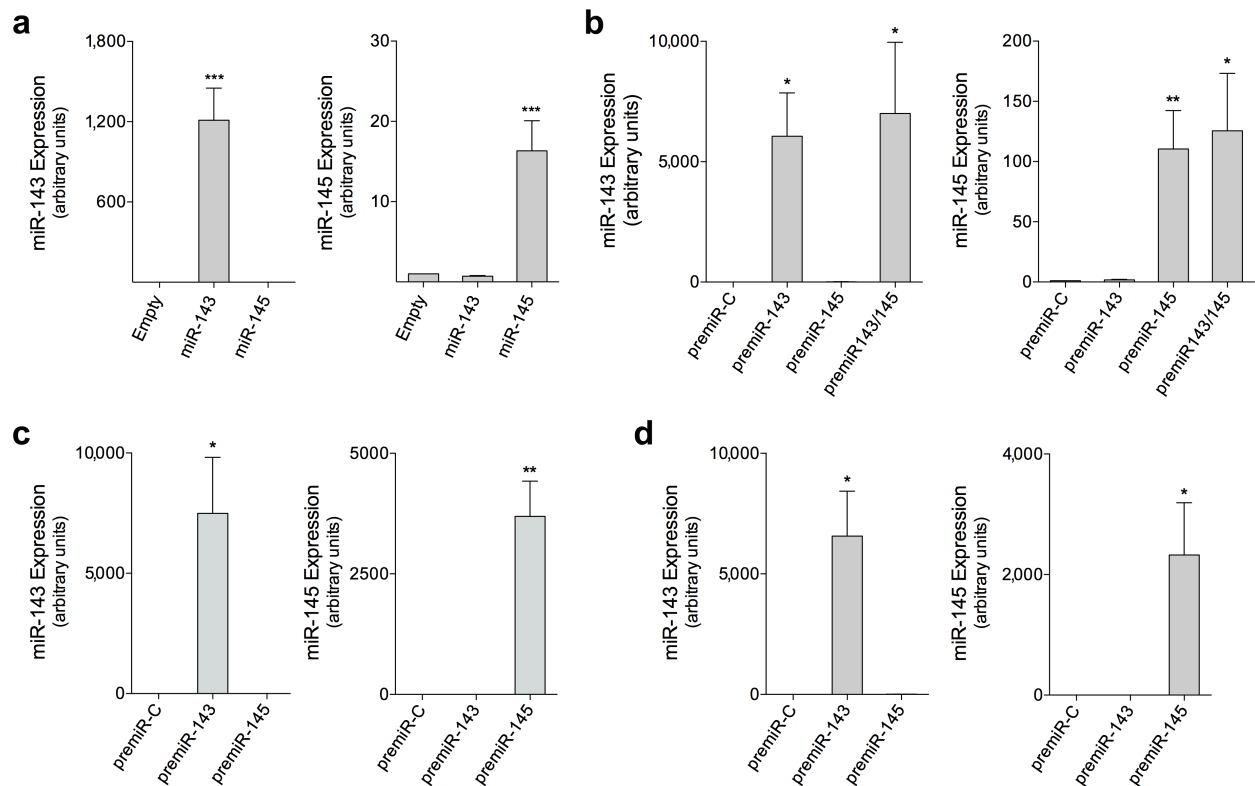

**S1 Fig. miR-143 and miR-145 expression in HCT116 (a, b), HT29 (c), and SW620 (b) human colon cancer cells.** (a) Cells were stably transduced with MSCV-Neo construct expressing either miR-143, miR-145, or Empty vector. (b, c and d) Cells were transiently transfected with specific precursors of miR-143 (premiR-143), miR-145 (premiR-145), alone or together, or miRNA negative control (premiR-C). miRNA expression was assayed by Taqman real-time PCR. Results are expressed as mean  $\pm$  SEM fold change to control cells. \*\*\* $p < 0.001$ , \*\* $p < 0.01$  from control cells.
