# Supplementary material for: Convergence of miR-143 overexpression, oxidative stress and cell death in HCT116 human colon cancer cells
Source: PubMed Central journal article supplement (PMC5779689; doi:10.1371/journal.pone.0191607), 2018-01-23
Supplement: pone.0191607.s002.pdf [file pone.0191607.s002.pdf]

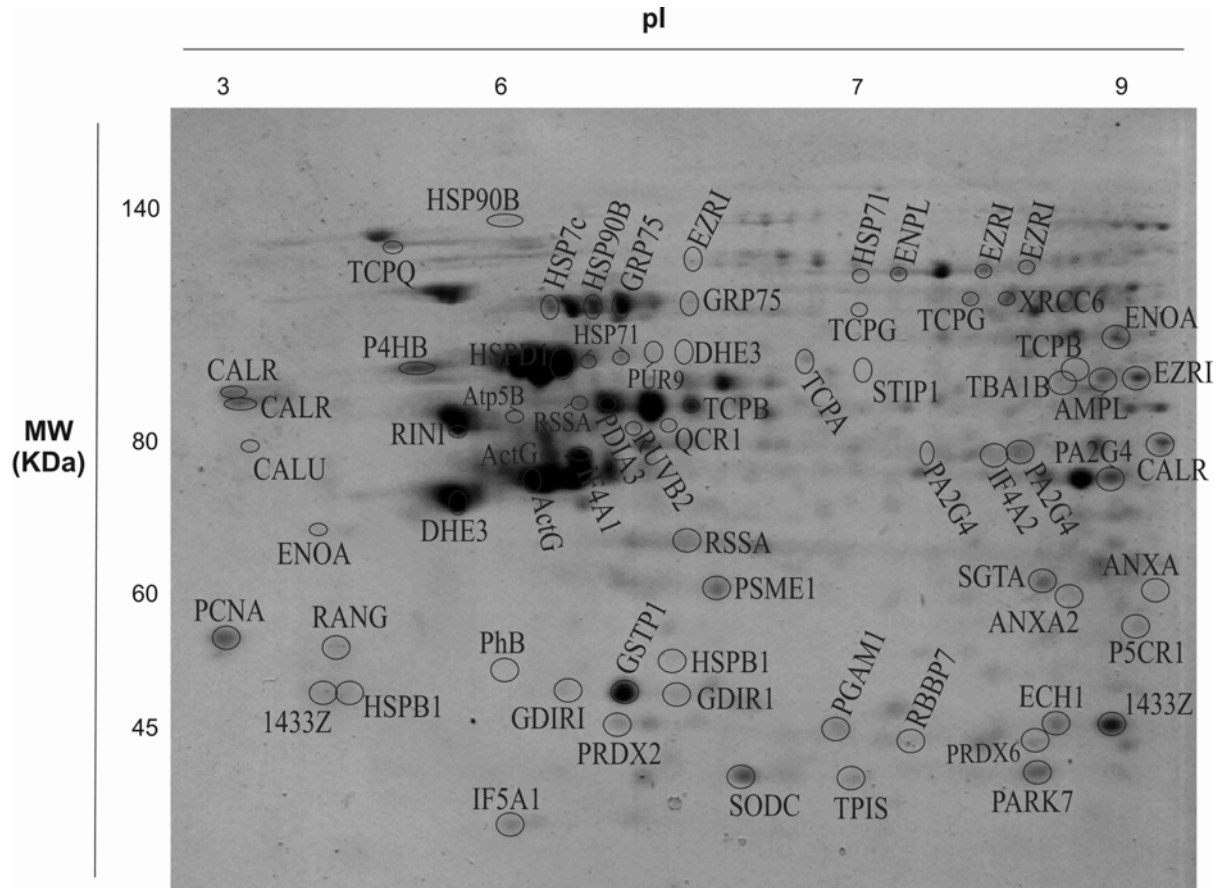

**S2 Fig. 2-DE proteome map of HCT116 human colon cancer cells.** Proteins were separated by IEF (pI 3-10 non-linear) in the first dimension and SDS-PAGE in the second dimension, and visualized by staining with Coomassie brilliant blue R-350.
