# Supplementary material for: Convergence of miR-143 overexpression, oxidative stress and cell death in HCT116 human colon cancer cells
Source: PubMed Central journal article supplement (PMC5779689; doi:10.1371/journal.pone.0191607), 2018-01-23
Supplement: pone.0191607.s003.pdf [file pone.0191607.s003.pdf]

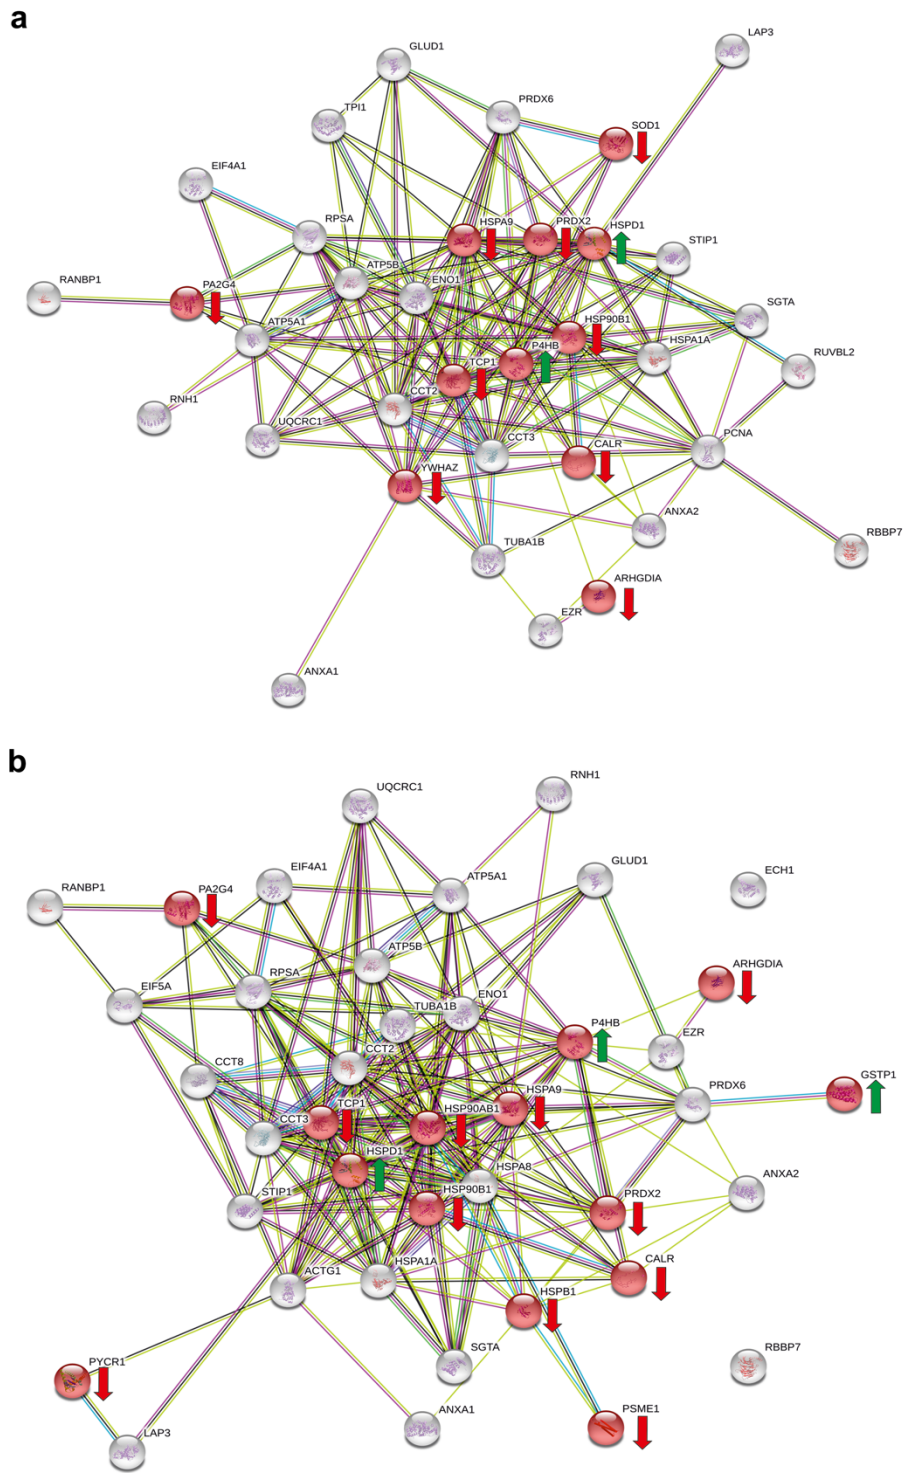

**S3 Fig. Protein-protein network in HCT116 human colon cancer cells overexpressing miR-143 or miR-145, relative to Empty vector. Nodes represent**

proteins and lines connecting nodes indicate direct or indirect interactions between proteins. **(a)** Protein-protein network altered in HCT116 cells overexpressing miR-143. Red nodes represent proteins involved in the regulation of apoptotic processes (Biological Process GO: 0042981). **(b)** Protein-protein network altered in HCT116 cells overexpressing miR-145. Red nodes represent proteins involved in the regulation of cell death (Biological Process GO:0010941). Red arrows represent proteins that were down-regulated in miR-143 or miR-145 2-DE patterns, while green arrows represent proteins that were up-regulated in miR-143 or miR-145 2-DE patterns.
