# Supplementary material for: Convergence of miR-143 overexpression, oxidative stress and cell death in HCT116 human colon cancer cells
Source: PubMed Central journal article supplement (PMC5779689; doi:10.1371/journal.pone.0191607), 2018-01-23
Supplement: pone.0191607.s004.pdf [file pone.0191607.s004.pdf]

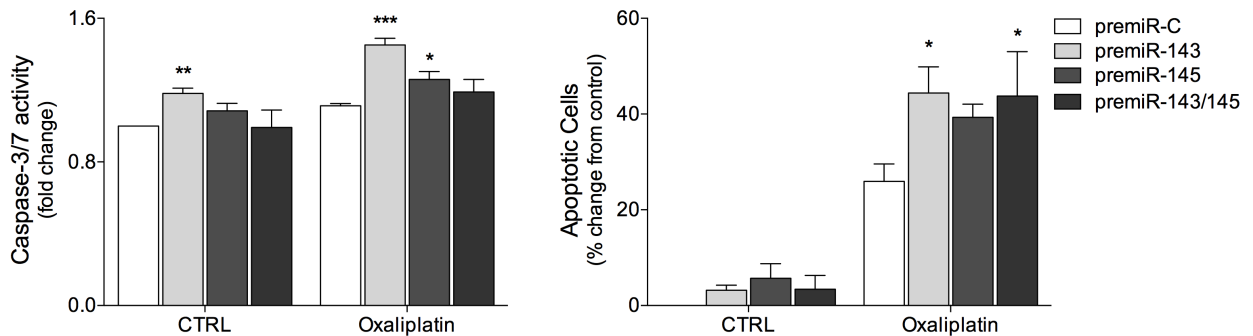

**S4 Fig. miR-143 and miR-145 overexpression increases sensitivity to oxaliplatin-mediated apoptosis in human colon cancer cells.** HCT116 cells transiently transfected with miR-143 (premiR-143), miR-145 (premiR-145), or control (premiR-C) precursors were treated with oxaliplatin (Ox). Caspase 3/7 activity was determined using Caspase-Glo 3/7 assay (left). Apoptosis was quantified by flow cytometry using Guava Nexin assay (right). Results are expressed as mean caspase activity  $\pm$  SEM fold change and percentage change of apoptotic cells  $\pm$  SEM, from at least three independent experiments. \*\*\*  $p < 0.001$ , \*\*  $p < 0.01$ , \*  $p < 0.05$  from Empty cells treated with oxaliplatin.
