# Supplementary material for: Convergence of miR-143 overexpression, oxidative stress and cell death in HCT116 human colon cancer cells
Source: PubMed Central journal article supplement (PMC5779689; doi:10.1371/journal.pone.0191607), 2018-01-23
Supplement: pone.0191607.s005.pdf [file pone.0191607.s005.pdf]

**S1 Table. Average and standard deviation of the % volume of proteins in at least three independent 2-DE maps of HCT116 human colon cancer cells stably overexpressing miR-143, miR-145 or Empty vector.**

| Accession name_HUMAN | Empty |      | miR-143 |      | miR-145 |      |
|----------------------|-------|------|---------|------|---------|------|
|                      | Mean  | SD   | Mean    | SD   | Mean    | SD   |
| TCPQ_HUMAN           | 1.19  | 0.64 | 1.11    | 0.33 | 0.33    | 0.03 |
| HSP90B_HUMAN         | 0.32  | 0.08 | 0.41    | 0.10 | 0.24    | 0.01 |
| HSP90B_HUMAN         | 1.02  | 0.16 | 1.19    | 0.04 | 0.71    | 0.04 |
| ENPL_HUMAN           | 0.58  | 0.11 | 0.27    | 0.12 | 0.20    | 0.04 |
| SGTA_HUMAN           | 0.41  | 0.05 | 0.25    | 0.11 | 0.07    | 0.02 |
| 1433Z_HUMAN          | 0.93  | 0.29 | 1.09    | 0.24 | 0.68    | 0.14 |
| GSTP1_HUMAN          | 0.76  | 0.21 | 0.71    | 0.15 | 1.21    | 0.32 |
| PSME1_HUMAN          | 0.31  | 0.30 | 0.37    | 0.12 | 0.19    | 0.02 |
| IF5A1_HUMAN          | 0.39  | 0.10 | 0.28    | 0.08 | 0.70    | 0.10 |
| PCNA_HUMAN           | 0.49  | 0.08 | 0.82    | 0.79 | 0.46    | 0.16 |
| DHE3_HUMAN           | 0.49  | 0.47 | 1.00    | 0.19 | 2.01    | 0.80 |
| ActG_HUMAN           | 0.49  | 0.53 | 0.47    | 0.28 | 0.95    | 0.32 |
| ActG_HUMAN           | 0.49  | 0.31 | 0.47    | 0.11 | 0.41    | 0.26 |
| IF4A1_HUMAN          | 0.49  | 0.07 | 0.23    | 0.10 | 0.34    | 0.15 |
| RINI_HUMAN           | 0.49  | 0.06 | 0.89    | 0.25 | 0.17    | 0.01 |
| Atp5B_HUMAN          | 0.49  | 0.22 | 0.23    | 0.02 | 0.17    | 0.10 |
| CH60_HUMAN           | 0.49  | 0.55 | 2.71    | 0.05 | 1.49    | 0.17 |
| HS71A_HUMAN          | 0.49  | 0.09 | 1.00    | 0.05 | 0.67    | 0.59 |
| CALR_HUMAN           | 0.49  | 0.17 | 0.31    | 0.11 | 0.43    | 0.03 |
| CALR_HUMAN           | 0.49  | 0.19 | 0.38    | 0.20 | 0.47    | 0.24 |
| Atp5B_HUMAN          | 0.49  | 0.09 | 0.32    | 0.18 | 0.43    | 0.11 |
| PDIA1_HUMAN          | 0.49  | 0.24 | 1.15    | 0.17 | 1.52    | 0.37 |
| hsp7c_HUMAN          | 0.49  | 0.09 | 0.51    | 0.11 | 0.29    | 0.16 |
| HS71A_HUMAN          | 0.49  | 0.12 | 0.95    | 0.28 | 0.23    | 0.20 |
| GRP75_HUMAN          | 0.49  | 0.18 | 1.08    | 0.19 | 1.56    | 0.59 |
| GRP75_HUMAN          | 0.49  | 0.14 | 0.71    | 0.36 | 0.43    | 0.04 |
| PDIA3_HUMAN          | 0.49  | 0.09 | 0.51    | 0.04 | 0.63    | 0.40 |
| RSSA_HUMAN           | 0.49  | 0.14 | 1.49    | 1.00 | 0.57    | 0.13 |
| RUVB2_HUMAN          | 0.49  | 0.08 | 0.29    | 0.14 | 0.49    | 0.12 |
| TCPB_HUMAN           | 0.49  | 0.20 | 0.55    | 0.04 | 0.46    | 0.00 |
| GRP75_HUMAN          | 0.49  | 0.16 | 0.33    | 0.22 | 0.21    | 0.00 |
| TCPA_HUMAN           | 0.49  | 0.10 | 0.14    | 0.08 | 0.10    | 0.02 |
| HS71A_HUMAN          | 0.49  | 0.04 | 0.10    | 0.08 | 0.33    | 0.26 |
| EZRI_HUMAN           | 0.49  | 0.02 | 0.19    | 0.09 | 0.03    | 0.01 |
| EZRI_HUMAN           | 0.49  | 0.28 | 0.80    | 0.10 | 0.24    | 0.15 |

|             |      |      |      |      |      |      |
|-------------|------|------|------|------|------|------|
| TCPG_HUMAN  | 0.49 | 0.15 | 0.16 | 0.10 | 0.04 | 0.01 |
| STIP1_HUMAN | 0.49 | 0.13 | 0.09 | 0.01 | 0.08 | 0.01 |
| TCPG_HUMAN  | 0.49 | 0.23 | 0.16 | 0.05 | 0.22 | 0.06 |
| XRCC6_HUMAN | 0.49 | 0.04 | 0.38 | 0.01 | 0.37 | 0.07 |
| EZRI_HUMAN  | 0.49 | 0.01 | 0.11 | 0.03 | 0.13 | 0.05 |
| ENOA_HUMAN  | 0.49 | 0.11 | 0.47 | 0.18 | 0.11 | 0.03 |
| EZRI_HUMAN  | 0.49 | 0.04 | 0.46 | 0.20 | 0.29 | 0.03 |
| CALR_HUMAN  | 0.49 | 0.22 | 0.34 | 0.21 | 0.32 | 0.11 |
| PA2G4_HUMAN | 0.49 | 0.07 | 0.31 | 0.18 | 0.32 | 0.10 |
| AMPL_HUMAN  | 0.49 | 0.23 | 0.32 | 0.16 | 0.25 | 0.08 |
| TCBP_HUMAN  | 0.49 | 0.03 | 0.08 | 0.01 | 0.07 | 0.05 |
| TBA1B_HUMAN | 0.49 | 0.04 | 0.14 | 0.12 | 0.03 | 0.02 |
| ATPA_HUMAN  | 0.49 | 0.05 | 0.09 | 0.01 | 0.14 | 0.01 |
| QCR1_HUMAN  | 0.49 | 0.19 | 0.33 | 0.03 | 0.29 | 0.09 |
| PA2G4_HUMAN | 0.49 | 0.19 | 0.76 | 0.03 | 0.25 | 0.04 |
| ENOA_HUMAN  | 0.49 | 0.18 | 0.54 | 0.34 | 0.55 | 0.15 |
| ANXA_HUMAN  | 0.49 | 0.13 | 0.21 | 0.11 | 0.22 | 0.04 |
| ENOA_HUMAN  | 0.49 | 0.34 | 0.36 | 0.01 | 0.45 | 0.03 |
| ANXA2_HUMAN | 0.49 | 0.28 | 0.15 | 0.10 | 0.15 | 0.04 |
| P5CR1_HUMAN | 0.49 | 0.18 |      |      | 0.30 | 0.09 |
| ECH1_HUMAN  | 0.49 | 0.01 | 0.41 | 0.19 | 0.22 | 0.04 |
| PRDX6_HUMAN | 0.49 | 0.04 | 0.12 | 0.06 | 0.28 | 0.03 |
| RBBP7_HUMAN | 0.49 | 0.03 | 0.27 | 0.17 | 0.12 | 0.03 |
| SODC_HUMAN  | 0.5  | 0.0  | 0.3  | 0.1  | 0.4  | 0.0  |
| PRDX2_HUMAN | 0.5  | 0.3  | 0.3  | 0.2  | 0.3  | 0.1  |
| TPIS_HUMAN  | 0.5  | 0.1  | 0.3  | 0.1  | 0.5  | 0.1  |
| GDIR1_HUMAN | 0.49 | 0.05 | 0.21 | 0.06 | 0.19 | 0.12 |
| GDIR1_HUMAN | 0.5  | 0.0  | 0.1  | 0.0  | 0.4  | 0.2  |
| RSSA_HUMAN  | 0.5  | 0.1  | 0.4  | 0.1  | 0.3  | 0.0  |
| ENOA_HUMAN  | 0.49 | 0.09 | 0.24 | 0.03 | 0.20 | 0.01 |
| 1433Z_HUMAN | 0.5  | 0.2  | 0.3  | 0.1  | 0.4  | 0.1  |
| RANG_HUMAN  | 0.5  | 0.1  | 0.7  | 0.6  | 0.3  | 0.2  |
| HSPB1_HUMAN | 0.5  | 0.1  | 0.4  | 0.1  | 0.1  | 0.1  |
| PGAM1_HUMAN |      |      | 0.4  | 0.1  | 0.5  | 0.1  |
| PhB_HUMAN   |      |      | 0.2  | 0.1  | 0.1  | 0.1  |
| CALU_HUMAN  |      |      |      |      | 0.5  | 0.2  |
| HSPB1_HUMAN |      |      |      |      | 0.2  | 0.0  |
| Park7_HUMAN |      |      |      |      | 0.2  | 0.1  |
| IF4A2_HUMAN |      |      |      |      | 0.08 | 0.04 |
| PA2G4_HUMAN |      |      |      |      | 0.07 | 0.03 |
| PUR9_HUMAN  |      |      |      |      | 0.1  | 0.0  |
| DHE3_HUMAN  |      |      |      |      | 0.1  | 0.0  |

Results are shown as mean  $\pm$  standard deviation (SD).
