# Supplementary material for: Convergence of miR-143 overexpression, oxidative stress and cell death in HCT116 human colon cancer cells
Source: PubMed Central journal article supplement (PMC5779689; doi:10.1371/journal.pone.0191607), 2018-01-23
Supplement: pone.0191607.s006.pdf [file pone.0191607.s006.pdf]

**S2 Table. Fold variance of common proteins between HCT116 human colon cancer cells overexpressing miR-143, miR-145 or Empty vector.**

| Uniprot<br>Kb | Acession<br>name_HUMAN | Gene     | Name                                                                  | miR-143                |            | miR-145                |            |
|---------------|------------------------|----------|-----------------------------------------------------------------------|------------------------|------------|------------------------|------------|
|               |                        |          |                                                                       | miR-143<br>vs<br>Empty | p<br>value | miR-145<br>vs<br>Empty | p<br>value |
| P50990        | TCPQ_HUMAN             | CCT8     | T-complex protein 1 subunit theta                                     | 0.94                   | 0.89       | 0.27                   | 0.17       |
| P08238        | HSP90B_HUMAN           | HSP90AB1 | Heat shock protein HSP 90 - beta                                      | 1.28                   | 0.33       | 0.76                   | 0.29       |
| P08238        | HSP90B_HUMAN           | HSP90AB1 | Heat shock protein HSP 90 - beta                                      | 1.18                   | 0.24       | 0.70                   | 0.09       |
| P14625        | ENPL_HUMAN             | HSP90B1  | Endoplasmic                                                           | 0.46                   | 0.05       | 0.34                   | 0.02       |
| O43765        | SGTA_HUMAN             | SGTA     | Small glutamin-rich tetratricopeptide repeat-containing protein alpha | 0.60                   | 0.09       | 0.16                   | 0.00       |
| P63104        | 1433Z_HUMAN            | YWHAZ    | 14-3-3 protein zeta/delta                                             | 1.17                   | 0.58       | 0.73                   | 0.36       |
| P09211        | GSTP1_HUMAN            | GSTP1    | Glutathione S-transferase P                                           | 0.94                   | 0.80       | 1.58                   | 0.15       |
| Q06323        | PSME1_HUMAN            | PSME1    | Proteasome activator complex subunit 1                                | 1.19                   | 0.81       | 0.60                   | 0.61       |
| P63241        | IF5A1_HUMAN            | EIF5A    | Eukaryotic translation initiation factor 5A-1                         | 0.72                   | 0.28       | 1.78                   | 0.05       |
| P12004        | PCNA_HUMAN             | PCNA     | Proliferating cell nuclear antigen                                    | 1.67                   | 0.49       | 0.95                   | 0.82       |
| P00367        | DHE3_HUMAN             | GLUD1    | Glutamate dehydrogenase 1, mitochondrial                              | 2.05                   | 0.11       | 4.10                   | 0.77       |
| P63261        | ActG_HUMAN             | ACTG1    | Actin, cytoplasmic 2                                                  | 0.96                   | 0.34       | 1.94                   | 1.00       |
| P63261        | ActG_HUMAN             | ACTG1    | Actin, cytoplasmic 2                                                  | 0.96                   | 0.32       | 0.84                   | 0.30       |
| P60842        | IF4A1_HUMAN            | EIF4A1   | Eukaryotic initiation factor 4A-1                                     | 0.48                   | 0.05       | 0.70                   | 0.26       |
| Q13671        | RINI_HUMAN             | RNH1     | Ras and Rab interactor 1                                              | 1.81                   | 0.18       | 0.34                   | 0.00       |
| P06576        | Atp5B_HUMAN            | ATP5B    | ATP synthase subunit beta, mitochondrial                              | 0.47                   | 0.72       | 0.35                   | 0.52       |
| P10809        | CH60_HUMAN             | HSPD1    | 60 kDa heat shock protein, mitochondrial                              | 5.54                   | 0.99       | 3.03                   | 0.06       |
| P0DMV8        | HS71A_HUMAN            | HSPA1A   | Heat shock 70 kDa protein 1A                                          | 2.05                   | 0.79       | 1.36                   | 0.40       |
| P27797        | CALR_HUMAN             | CALR     | Calreticulin                                                          | 0.63                   | 0.91       | 0.87                   | 0.37       |
| P27797        | CALR_HUMAN             | CALR     | Calreticulin                                                          | 0.77                   | 0.68       | 0.96                   | 0.42       |
| P06576        | Atp5B_HUMAN            | ATP5B    | ATP synthase subunit beta, mitochondrial                              | 0.65                   | 0.37       | 0.89                   | 0.07       |
| P07237        | PDIA1_HUMAN            | P4HB     | Protein disulfide-isomerase                                           | 2.35                   | 0.14       | 3.11                   | 0.06       |

|        |             |        |                                                  |      |      |      |      |
|--------|-------------|--------|--------------------------------------------------|------|------|------|------|
| P11142 | hsp7c_HUMAN | HSPA8  | Heat shock cognate 71 kDa protein                | 1.03 | 0.24 | 0.59 | 0.48 |
| P0DMV8 | HS71A_HUMAN | HSPA1A | Heat shock 70 kDa protein 1A                     | 1.95 | 0.07 | 0.48 | 0.20 |
| P38646 | GRP75_HUMAN | HSPA9  | Stress-70 protein, mitochondrial                 | 2.20 | 0.61 | 3.19 | 0.34 |
| P38646 | GRP75_HUMAN | HSPA9  | Stress-70 protein, mitochondrial                 | 1.45 | 0.78 | 0.88 | 0.04 |
| P30101 | PDIA3_HUMAN | PDIA3  | Protein disulfide-isomerase A3                   | 1.04 | 0.03 | 1.29 | 0.18 |
| P08865 | RSSA_HUMAN  | RPSA   | 40S ribosomal protein SA                         | 3.04 | 0.14 | 1.16 | 0.32 |
| Q9Y230 | RUVB2_HUMAN | RUVBL2 | RuvB-like 2                                      | 0.59 | 0.70 | 1.00 | 0.07 |
| P78371 | TCPB_HUMAN  | CCT2   | T-complex protein 1 subunit beta                 | 1.12 | 0.08 | 0.94 | 0.05 |
| P38646 | GRP75_HUMAN | HSPA9  | Stress-70 protein, mitochondrial                 | 0.67 | 0.55 | 0.44 | 0.16 |
| P17987 | TCPA_HUMAN  | TCP1   | T-complex protein 1 subunit alpha                | 0.29 | 0.67 | 0.20 | 0.33 |
| P0DMV8 | HS71A_HUMAN | HSPA1A | Heat shock 70 kDa protein 1A                     | 0.20 | 0.07 | 0.68 | 0.55 |
| P15311 | EZRI_HUMAN  | EZR    | Ezrin                                            | 0.39 | 0.28 | 0.06 | 0.01 |
| P15311 | EZRI_HUMAN  | EZR    | Ezrin                                            | 1.64 | 0.37 | 0.49 | 0.23 |
| P49368 | TCPG_HUMAN  | CCT3   | T-complex protein 1 subunit gamma                | 0.33 | 0.86 | 0.09 | 0.30 |
| P31948 | STIP1_HUMAN | STIP1  | Stress-induced-phosphoprotein 1                  | 0.19 | 0.81 | 0.17 | 0.73 |
| P49368 | TCPG_HUMAN  | CCT3   | T-complex protein 1 subunit gamma                | 0.33 | 0.31 | 0.46 | 0.45 |
| P12956 | XRCC6_HUMAN | XRCC6  | X-ray repair cross-complementing protein 6       | 0.77 | 0.37 | 0.75 | 0.45 |
| P15311 | EZRI_HUMAN  | EZR    | Ezrin                                            | 0.23 | 0.70 | 0.26 | 0.87 |
| P06733 | ENOA_HUMAN  | ENO1   | Alpha-enolase                                    | 1.0  | 0.64 | 0.2  | 0.04 |
| P15311 | EZRI_HUMAN  | EZR    | Ezrin                                            | 0.94 | 0.41 | 0.59 | 0.11 |
| P27797 | CALR_HUMAN  | CALR   | Calreticulin                                     | 0.70 | 0.08 | 0.66 | 0.05 |
| Q9UQ80 | PA2G4_HUMAN | PA2G4  | Proliferation-associated protein 2G4             | 0.64 | 0.34 | 0.66 | 0.23 |
| P28838 | AMPL_HUMAN  | LAP3   | Cytosol aminopeptidase                           | 0.65 | 0.27 | 0.52 | 0.16 |
| P78371 | TCBP_HUMAN  | CCT2   | T-complex protein 1 subunit beta                 | 0.16 | 0.62 | 0.15 | 0.84 |
| P68363 | TBA1B_HUMAN | TUBA1B | Tubulin alpha-1B chain                           | 0.28 | 0.99 | 0.06 | 0.04 |
| P25705 | ATPA_HUMAN  | ATP5A1 | ATP synthase subunit alpha, mitochondrial        | 0.18 | 0.41 | 0.29 | 0.61 |
| P31930 | QCR1_HUMAN  | UQCRC1 | Cytochrome b-c1 complex subunit 1, mitochondrial | 0.67 | 0.80 | 0.58 | 0.99 |
| Q9UQ80 | PA2G4_HUMAN | PA2G4  | Proliferation-associated protein 2G4             | 1.55 | 0.35 | 0.51 | 0.09 |
| P06733 | ENOA_HUMAN  | ENO1   | Alpha-enolase                                    | 1.10 | 0.58 | 1.12 | 0.46 |

|                     |             |         |                                                            |      |      |      |      |
|---------------------|-------------|---------|------------------------------------------------------------|------|------|------|------|
| P04083              | ANXA_HUMAN  | ANXA1   | Annexin A1                                                 | 0.43 | 0.04 | 0.45 | 0.03 |
| P06733              | ENOA_HUMAN  | ENO1    | Alpha-enolase                                              | 0.74 | 0.56 | 0.91 | 0.77 |
| P07355              | ANXA2_HUMAN | ANXA2   | Annexin A2                                                 | 0.31 | 0.30 | 0.30 | 0.28 |
| P32322              | P5CR1_HUMAN | PYCR1   | Pyrroline-5-carboxylate reductase 1, mitochondrial         |      |      | 0.61 | 0.95 |
| Q13011              | ECH1_HUMAN  | ECH1    | Delta(3,5)-Delta(2,4)-dienoyl-CoA isomerase, mitochondrial | 0.84 | 0.39 | 0.45 | 0.02 |
| P30041              | PRDX6_HUMAN | PRDX6   | Peroxiredoxin-6                                            | 0.24 | 0.69 | 0.57 | 0.01 |
| Q16576              | RBBP7_HUMAN | RBBP7   | Histone-binding protein RBBP7                              | 0.55 | 0.38 | 0.25 | 0.15 |
| P00441              | SODC_HUMAN  | SOD1    | Superoxide dismutase [Cu-Zn]                               | 0.60 | 0.29 | 0.85 | 0.00 |
| P32119              | PRDX2_HUMAN | PRDX2   | Peroxideroxin-2                                            | 0.53 | 0.55 | 0.62 | 0.64 |
| P60174              | TPIS_HUMAN  | TPI1    | Triosephosphate isomerase                                  | 0.57 | 0.96 | 1.05 | 0.14 |
| P52565              | GDIR1_HUMAN | ARHGDI1 | Rho GDP-dissociation inhibitor 1                           | 0.42 | 0.61 | 0.38 | 0.56 |
| P52565              | GDIR1_HUMAN | ARHGDI1 | Rho GDP-dissociation inhibitor 1                           | 0.10 | 0.02 | 0.88 | 0.09 |
| P08865              | RSSA_HUMAN  | RPSA    | 40S ribosomal protein SA                                   | 0.73 | 0.99 | 0.70 | 0.87 |
| P06733              | ENOA_HUMAN  | ENO1    | Alpha-enolase                                              | 0.5  | 0.56 | 0.4  | 0.96 |
| P63104              | 1433Z_HUMAN | YWHAZ   | 14-3-3 protein zeta/delta                                  | 0.60 | 0.75 | 0.91 | 0.28 |
| P43487              | RANG_HUMAN  | RANBP1  | Ran-specific GTPase-activating protein                     | 1.52 | 0.19 | 0.57 | 0.47 |
| P04792              | HSPB1_HUMAN | HSPB1   | Heat shock protein beta-1                                  | 0.82 | 0.22 | 0.15 | 0.35 |
| P18669 <sup>a</sup> | PGAM1_HUMAN | PGAM1   | Phosphoglycerate mutase                                    |      |      |      |      |
| P35232 <sup>a</sup> | PHB_HUMAN   | PHB     | Prohibitin                                                 |      |      |      |      |
| Q99497 <sup>b</sup> | Park7_HUMAN | PARK7   | Protein deglycase DJ-1                                     |      |      |      |      |
| Q14240 <sup>b</sup> | IF4A2       | EIF4A2  | Eukaryotic initiation factor 4A-II                         |      |      |      |      |
| P00367 <sup>b</sup> | DHE3_HUMAN  | GLUD1   | Glutamate dehydrogenase 1, mitochondrial                   |      |      |      |      |

<sup>a</sup> Only found in HCT116 cells stably overexpressing miR-143 or miR-145 2-DE protein spot patterns; <sup>b</sup> only found in HCT116 cells stably overexpressing miR-145 2-DE protein spot pattern. *p*-value for each fold was obtained using Student's *t*-test.
